# Supplementary material
Source: HighWire-hosted journal article supplement (https://www.ajnr.org/highwire/filestream/52243/field_highwire_adjunct_files/0/2708_tables.pdf)
Supplement: 2708_tables.pdf [file 2708_tables.pdf]

**On-line Table 1: Baseline demographic and clinical characteristics of the asphyxiated newborns<sup>a</sup>**

| No. | Gestational |                 | Sex | Acute                        |                  | Apgar | Arterial  |                        | Multi-Organ Failure | Onset                        |          | Initial aEEG Pattern <sup>b</sup> | Seizures (hr of onset after birth) | Outcome |
|-----|-------------|-----------------|-----|------------------------------|------------------|-------|-----------|------------------------|---------------------|------------------------------|----------|-----------------------------------|------------------------------------|---------|
|     | Age (week)  | Birthweight (g) |     | Perinatal Event <sup>a</sup> | Mode of Delivery |       | Cord pH   | Postnatal Blood Gas pH |                     | Hypothermia (hr after birth) |          |                                   |                                    |         |
| 1   | 39.9        | 3735            | F   | +                            | Vaginal          | 2/6/8 | 6.9       | 7.4                    | +                   | 3.7                          | Moderate | –                                 | Alive                              |         |
| 2   | 39.0        | 3500            | M   | +                            | C-section        | 1/2/5 | 6.9       | 6.9                    | +                   | 4.6                          | Moderate | 3.5                               | Alive                              |         |
| 3   | 40.7        | 4180            | M   | +                            | Vaginal          | 0/4/6 | 6.9       | 7.2                    | –                   | 4.4                          | Moderate | –                                 | Alive                              |         |
| 4   | 39.0        | 2510            | M   | +                            | C-section        | 2/4/5 | 6.9       | 7.0                    | +                   | 5.3                          | Moderate | –                                 | Alive                              |         |
| 5   | 39.1        | 4060            | M   | +                            | C-section        | 0/0/4 | Not known | 6.8                    | +                   | 3.4                          | Severe   | 4.0                               | Alive                              |         |
| 6   | 38.6        | 3570            | M   | +                            | C-section        | 2/3/4 | 6.9       | 7.2                    | +                   | 3.9                          | Severe   | –                                 | Alive                              |         |
| 7   | 39.6        | 3220            | F   | +                            | Vaginal          | 1/1/3 | 6.8       | 6.9                    | +                   | 3.7                          | Severe   | 10.0                              | Alive                              |         |
| 8   | 39.7        | 3970            | M   | +                            | Vaginal          | 0/0/3 | 7.0       | 7.1                    | +                   | 4.4                          | Severe   | 34.2                              | Dead                               |         |
| 9   | 39.1        | 3500            | M   | +                            | C-section        | 1/4/– | 7.0       | 7.1                    | +                   | 5.6                          | Severe   | 1.0                               | Dead                               |         |
| 10  | 39.1        | 3600            | F   | +                            | C-section        | 0/0/0 | Not known | 6.6                    | +                   | 5.3                          | Severe   | 2.0                               | Dead                               |         |
| 11  | 39.4        | 3700            | F   | +                            | C-section        | 0/1/2 | 6.6       | 7.2                    | +                   | 2.9                          | Severe   | 2.0                               | Dead                               |         |
| 12  | 41.0        | 3844            | M   | +                            | Vaginal          | 3/7/7 | Not known | Not known              | –                   | –                            | –        | 8.8                               | Alive                              |         |
| 13  | 37.1        | 2695            | M   | +                            | Vaginal          | 6/7/– | Not known | Not known              | +                   | –                            | –        | 20.0                              | Alive                              |         |
| 14  | 41.3        | 3725            | M   | +                            | Vaginal          | 4/8/– | Not known | Not known              | +                   | –                            | –        | –                                 | Alive                              |         |
| 15  | 41.0        | 3100            | F   | +                            | Vaginal          | 8/8/– | Not known | Not known              | +                   | –                            | –        | –                                 | Alive                              |         |
| 16  | 39.0        | 3925            | M   | +                            | Vaginal          | 2/4/6 | Not known | Not known              | +                   | –                            | –        | 3.0                               | Alive                              |         |
| 17  | 35.9        | 2480            | F   | +                            | Vaginal          | 5/5/5 | Not known | 7.2                    | –                   | –                            | –        | –                                 | Alive                              |         |
| 18  | 36.0        | 2790            | M   | +                            | C-section        | 4/7/– | Not known | Not known              | +                   | –                            | –        | 12.0                              | Alive                              |         |

**Note:** C-section, cesarean delivery.

<sup>a</sup> Including, for example, abruptio placentae, cord prolapse, severe fetal heart rate abnormality, variable or late decelerations.

<sup>b</sup> Categorized as moderately abnormal (upper margin >10  $\mu V$  and lower margin <5  $\mu V$ ) or severely abnormal (upper margin <10  $\mu V$ ), according to Gluckman et al.<sup>18</sup>

**On-line Table 2: Timing of MRI during the first week of life, CBF values measured on this MRI, and outcome on conventional imaging**

| No.        | MR Imaging<br>(hr after<br>birth) | MR Imaging<br>(hr after onset<br>hypothermia) | GM CBF <sup>a</sup><br>(mL/100 g/min) | WM CBF <sup>a</sup><br>(mL/100<br>g/min) | BG CBF <sup>a</sup><br>(mL/100 g/min) | Outcome on Conventional Imaging                 |
|------------|-----------------------------------|-----------------------------------------------|---------------------------------------|------------------------------------------|---------------------------------------|-------------------------------------------------|
| Control 1  | DOL 2                             | —                                             | 38.5 ± 4.0                            | 3.6 ± 1.2                                | 30.9 ± 2.4                            |                                                 |
| Control 2  | DOL 3                             | —                                             | 42.4 ± 3.0                            | 2.6 ± 1.0                                | 28.8 ± 1.7                            |                                                 |
| Control 3  | DOL 4                             | —                                             | 38.0 ± 3.1                            | 2.3 ± 0.6                                | 28.2 ± 1.9                            |                                                 |
| Control 4  | DOL 10                            | —                                             | 39.7 ± 4.0                            | 2.9 ± 0.8                                | 29.3 ± 2.5                            |                                                 |
| Patient 1  | DOL 1 (6.0)                       | 2.3                                           | 18.6 ± 3.0                            | 4.1 ± 2.8                                | 8.8 ± 1.6                             | No brain injury on DOL 1, 2, 10, and 32         |
|            | DOL 2 (43.0)                      | 39.3                                          | 39.9 ± 3.5                            | 2.4 ± 1.0                                | 27.5 ± 1.9                            |                                                 |
| Patient 2  | DOL 1 (12.0)                      | 7.4                                           | 34.8 ± 5.4                            | 4.3 ± 2.3                                | 18.2 ± 3.4                            | No brain injury                                 |
|            | DOL 2 (36.0)                      | 31.4                                          | 38.7 ± 4.9                            | 2.4 ± 0.9                                | 25.0 ± 4.0                            | No DOL 1, 2, 13, and 34                         |
| Patient 3  | DOL 1 (19.9)                      | 15.5                                          | 34.0 ± 5.3                            | 4.2 ± 2.2                                | 24.2 ± 3.7                            | No brain injury on DOL 1, 2, 10, and 31         |
|            | DOL 2 (43.9)                      | 39.5                                          | 39.1 ± 2.6                            | 2.6 ± 0.9                                | 26.4 ± 2.4                            |                                                 |
| Patient 4  | DOL 2 (39.0)                      | 33.7                                          | 38.5 ± 2.6                            | 3.1 ± 1.2                                | 25.6 ± 2.8                            | No brain injury on DOL 2, 10, and 31            |
| Patient 5  | DOL 1 (15.0)                      | 11.7                                          | 24.4 ± 3.5                            | 3.6 ± 1.9                                | 15.3 ± 3.1                            | No brain injury on DOL 1, 2, 11, and 31         |
|            | DOL 2 (41.0)                      | —                                             | 27.5 ± 3.6                            | 2.2 ± 1.3                                | 19.7 ± 3.4                            |                                                 |
| Patient 6  | DOL 1 (24.0)                      | 20.1                                          | 24.5 ± 3.8                            | 2.9 ± 1.2                                | 14.9 ± 2.5                            | No brain injury on DOL 1, 2, 10, and 31         |
|            | DOL 2 (48.0)                      | 44.1                                          | 32.1 ± 3.4                            | 2.7 ± 1.4                                | 20.6 ± 3.5                            |                                                 |
| Patient 7  | DOL 3 (64.0)                      | 60.3                                          | 38.4 ± 3.0                            | 2.5 ± 1.3                                | 26.6 ± 3.1                            | No brain injury on DOL 3 and 9                  |
| Patient 8  | DOL 1 (6.5)                       | 2.1                                           | <b>13.1 ± 2.1</b>                     | <b>5.7 ± 3.0</b>                         | <b>6.2 ± 2.6</b>                      | <b>GM + WM + BG</b> injury on DOL 2             |
|            | DOL 2 (26.0)                      | 21.6                                          | <b>64.4 ± 11.8</b>                    | <b>19.0 ± 9.3</b>                        | <b>77.7 ± 19.3</b>                    |                                                 |
| Patient 9  | DOL 1 (7.0)                       | 1.4                                           | 21.4 ± 3.8                            | 2.6 ± 0.8                                | <b>2.5 ± 1.2</b>                      | <b>BG</b> injury on DOL 2, 10, and 32           |
|            | DOL 2 (29.5)                      | 23.9                                          | 26.2 ± 2.7                            | 1.9 ± 1.0                                | <b>7.9 ± 3.6</b>                      |                                                 |
| Patient 10 | DOL 1 (8.5)                       | 4.4                                           | 21.0 ± 4.5                            | 4.7 ± 1.7                                | <b>5.3 ± 2.2</b>                      | <b>T</b> injury on DOL 2                        |
|            | DOL 2 (35.5)                      | 29.7                                          | 24.9 ± 2.8                            | 2.1 ± 1.2                                | <b>33.5 ± 5.2 (T)</b>                 |                                                 |
|            |                                   |                                               |                                       |                                          | and 16.1 ± 2.6 (R BG)                 |                                                 |
| Patient 11 | DOL 1 (11.0)                      | 8.1                                           | 18.4 ± 4.5                            | 3.2 ± 0.8                                | 8.3 ± 2.0 <sup>c</sup>                | <b>T</b> injury on DOL 2                        |
|            | DOL 2 (41.0)                      | 38.1                                          | 27.2 ± 3.3                            | 2.2 ± 0.9                                | <b>33.1 ± 3.6 (T)</b>                 |                                                 |
|            |                                   |                                               |                                       |                                          | 17.2 ± 2.5 (R BG)                     |                                                 |
| Patient 12 | DOL 1                             | —                                             | <b>56.0 ± 9.0</b>                     | <b>12.4 ± 2.8</b>                        | <b>44.0 ± 7.8</b>                     | <b>GM + WM + BG</b> injury on DOL 3, 10, and 30 |
|            | DOL 3                             | —                                             | <b>88.2 ± 10.0</b>                    | <b>14.5 ± 2.6</b>                        | <b>88.5 ± 9.3</b>                     |                                                 |
| Patient 13 | DOL 3                             | —                                             | <b>75.2 ± 11.3</b>                    | <b>15.5 ± 4.0</b>                        | <b>43.8 ± 7.1</b>                     | <b>GM + WM + BG</b> injury on DOL 3 and 11      |
| Patient 14 | DOL 3                             | —                                             | <b>64.2 ± 9.5</b>                     | <b>9.2 ± 3.5</b>                         | <b>56.7 ± 11.5</b>                    | <b>GM + WM + BG</b> injury on DOL 3 and 9       |
| Patient 15 | DOL 3                             | —                                             | <b>56.5 ± 6.1 (P)</b>                 | <b>1.3 ± 0.9</b>                         | <b>53.3 ± 7.7</b>                     | <b>P + BG</b> injury on DOL 3                   |
|            |                                   |                                               | and 40.1 ± 2.8 (R GM)                 |                                          |                                       |                                                 |
| Patient 16 | DOL 4                             | —                                             | <b>49.4 ± 4.8</b>                     | <b>5.4 ± 2.4</b>                         | 28.9 ± 3.0                            | <b>GM + WM</b> injury on DOL 4 and 8            |
| Patient 17 | DOL 5                             | —                                             | <b>49.4 ± 5.6</b>                     | <b>11.3 ± 3.3</b>                        | <b>36.0 ± 3.8</b>                     | <b>GM + WM + BG</b> injury on DOL 5             |
| Patient 18 | DOL 6                             | —                                             | <b>44.8 ± 4.5</b>                     | <b>5.5 ± 2.8</b>                         | 28.7 ± 2.2                            | <b>GM + WM</b> injury on DOL 6                  |

**Note:**—P, Parietal; MRI, MR imaging.

<sup>a</sup>CBF values in the brain areas exhibiting injury are highlighted in bold.

**On-line Table 3: Variables that might influence cerebral blood flow**

| No. | MR Imaging<br>(hr after birth) | Temperature<br>(°C) | pCO <sub>2</sub><br>(mm Hg) | FiO <sub>2</sub> | Hematocrit | Mechanical<br>Ventilation | Pressor<br>Support | Sedation | Antiepileptic<br>Treatment |
|-----|--------------------------------|---------------------|-----------------------------|------------------|------------|---------------------------|--------------------|----------|----------------------------|
| 1   | DOL 1 (6.0)                    | 32.1                | 26.8                        | 0.21             | 45.7       | Yes                       | No                 | Yes      | No                         |
|     | DOL 2 (43.0)                   | 33.4                | 34.3                        | 0.21             | 37.2       | Yes                       | No                 | Yes      | No                         |
| 2   | DOL 1 (12.0)                   | 33.7                | 40.4                        | 0.21             | 35.4       | Yes                       | Yes                | Yes      | Yes                        |
|     | DOL 2 (36.0)                   | 33.6                | 41.6                        | 0.35             | 41.7       | Yes                       | Yes                | No       | Yes                        |
| 3   | DOL 1 (19.9)                   | 35.6                | 30.6                        | 0.21             | 38.7       | Yes                       | Yes                | Yes      | No                         |
|     | DOL 2 (43.9)                   | 33.4                | 36.2                        | 0.21             | 36.3       | Yes                       | Yes                | Yes      | No                         |
| 4   | DOL 2 (39.0)                   | 33.2                | 39.3                        | 0.38             | 37.3       | Yes                       | Yes                | Yes      | No                         |
| 5   | DOL 1 (15.0)                   | 31.4                | 40.2                        | 0.25             | 31.6       | Yes                       | Yes                | Yes      | Yes                        |
|     | DOL 2 (41.0)                   | 35.8                | 39.8                        | 0.30             | 48.5       | Yes                       | Yes                | Yes      | Yes                        |
| 6   | DOL 1 (24.0)                   | 33.4                | 34.2                        | 0.21             | 44.6       | Yes                       | No                 | Yes      | No                         |
|     | DOL 2 (48.0)                   | 33.1                | 36.1                        | 0.21             | 36.6       | Yes                       | No                 | Yes      | No                         |
| 7   | DOL 3 (64.0)                   | 32.8                | 39.2                        | 0.21             | 40.0       | Yes                       | Yes                | Yes      | Yes                        |
| 8   | DOL 1 (6.5)                    | 33.3                | 35.8                        | 0.25             | 39.8       | Yes                       | No                 | Yes      | No                         |
|     | DOL 2 (26.0)                   | 32.7                | 42.0                        | 0.21             | 37.9       | Yes                       | No                 | Yes      | No                         |
| 9   | DOL 1 (7.0)                    | 33.1                | 30.6                        | 0.21             | 38.2       | Yes                       | No                 | Yes      | Yes                        |
|     | DOL 2 (29.5)                   | 33.3                | 31.8                        | 0.21             | 37.5       | Yes                       | No                 | Yes      | Yes                        |
| 10  | DOL 1 (8.5)                    | 33.1                | 30.6                        | 0.25             | 45.9       | Yes                       | No                 | Yes      | Yes                        |
|     | DOL 2 (35.5)                   | 32.6                | 30.9                        | 0.21             | 37.0       | Yes                       | No                 | No       | Yes                        |
| 11  | DOL 1 (11.0)                   | 33.1                | 28.0                        | 0.21             | 50.2       | Yes                       | No                 | No       | Yes                        |
|     | DOL 2 (41.0)                   | 33.4                | 30.1                        | 0.21             | 50.1       | Yes                       | No                 | No       | Yes                        |
| 12  | DOL 1                          | 36.8                | –                           | 1.00             | –          | No                        | No                 | No       | Yes                        |
|     | DOL 3                          | 37.0                | –                           | 0.21             | 32.9       | No                        | No                 | No       | Yes                        |
| 13  | DOL 3                          | 37.0                | 41.3                        | 0.21             | 39.2       | Yes                       | Yes                | No       | Yes                        |
| 14  | DOL 3                          | 37.0                | –                           | 0.21             | –          | No                        | No                 | No       | No                         |
| 15  | DOL 3                          | 35.9                | 35.5                        | 0.24             | 45.7       | Yes                       | No                 | Yes      | No                         |
| 16  | DOL 4                          | 37.1                | 36.6                        | 0.21             | 37.6       | Yes                       | No                 | No       | Yes                        |
| 17  | DOL 5                          | 36.8                | –                           | 0.21             | –          | No                        | No                 | No       | No                         |
| 18  | DOL 6                          | 35.9                | –                           | 0.21             | 46.9       | No                        | No                 | Yes      | Yes                        |
